# Supplementary material for: Antibodies to Porphyromonas gingivalis Are Increased in Patients with Severe Periodontitis, and Associate with Presence of Specific Autoantibodies and Myocardial Infarction
Source: MDPI journal article supplement (doi:10.3390/jcm11041008), 2022-02-15
Supplement: s1 [file s1]

**Supplementary Table S2.** Autoantibodies in PAROKRANK and in the SLE cohort

| <b>AutoAb</b>              | <b>PAROKRANK (n=1498)</b><br>n (%) <sup>1</sup> | <b>SLE patients (n=101)</b><br>n (%) |
|----------------------------|-------------------------------------------------|--------------------------------------|
| <b>CCP2 IgG</b>            | 52 (3.5)                                        | NA                                   |
| <b>RF</b>                  | 70 (4.7)                                        | 28 (27.7)                            |
| <b>dsDNA</b>               | 31 (2.1)                                        | 62 (61.4)                            |
| <b>Sm</b>                  | 1 (0.0)                                         | 21 (20.8)                            |
| <b>SmRNP</b>               | 4 (0.3)                                         | 30 (29.7)                            |
| <b>SSA Ro52</b>            | 12 (0.8)                                        | 35 (34.7)                            |
| <b>SSA Ro60</b>            | 12 (0.8)                                        | 44 (43.6)                            |
| <b>SSB</b>                 | 18 (1.2)                                        | 24 (23.8)                            |
| <b>RNP 68</b>              | 4 (0.3)                                         | 15 (14.9)                            |
| <b>B2GP1 IgA</b>           | 14 (0.9)                                        | 13 (12.9)                            |
| <b>B2GP1 IgG</b>           | 48 (3.2)                                        | 21 (20.8)                            |
| <b>B2GP1 IgM</b>           | 31 (2.1)                                        | 4 (4.0)                              |
| <b>CL IgA</b>              | 14 (0.9)                                        | 12 (11.9)                            |
| <b>CL IgG</b>              | 52 (3.5)                                        | 20 (19.8)                            |
| <b>CL IgM</b>              | 34 (2.3)                                        | 6 (5.9)                              |
| <b>ANA</b>                 | NA                                              | 98 (97.0)                            |
| <b>Centromere</b>          | NA                                              | 3 (3.0)                              |
| <b>Ribosomal P protein</b> | NA                                              | 4 (4.0)                              |
| <b>Nucleosome</b>          | NA                                              | 50 (49.5)                            |

<sup>1</sup> Numbers (n) and frequencies (%) of different autoantibodies are shown. CCP2 = cyclic citrullinated peptide 2, RF = rheumatoid factor, dsDNA = double stranded DNA, Sm = Smith, SmRNP= Smith ribonucleoprotein, SSA = Sjögren's-syndrome-related antigen A, SSB = Sjögren's-syndrome-related antigen B, B2GP1 =  $\beta$ 2-glycoprotein1, CL = cardiolipin, ANA = anti-nuclear antibodies, NA = not analysed.
