# Supplementary material for: Antibodies to Porphyromonas gingivalis Are Increased in Patients with Severe Periodontitis, and Associate with Presence of Specific Autoantibodies and Myocardial Infarction
Source: MDPI journal article supplement (doi:10.3390/jcm11041008), 2022-02-15
Supplement: s1 [file s1]

**Supplementary Table S3.** Clinical variables in the SLE cohort

| CLINICAL VARIABLES <sup>1</sup> : |
|-----------------------------------|
| Malar rash                        |
| Discoid lesions                   |
| Photosensitivity                  |
| Oral ulcers                       |
| Arthritis                         |
| Pleuritis                         |
| Pericarditis                      |
| Serositis                         |
| Nephritis                         |
| Psychosis                         |
| Seizures                          |
| Leukopenia                        |
| Lymphopenia                       |
| Thrombocytopenia                  |
| Haemolytic anemia                 |

<sup>1</sup> *Clinical variables, defined according to the revised ACR criteria for SLE, from 1982 (Tan et al, The 1982 revised criteria for the classification of systemic lupus erythematosus. Arthritis Rheum. 1982;25:1271-7).*
