# Supplementary material for: Antibodies to Porphyromonas gingivalis Are Increased in Patients with Severe Periodontitis, and Associate with Presence of Specific Autoantibodies and Myocardial Infarction
Source: MDPI journal article supplement (doi:10.3390/jcm11041008), 2022-02-15
Supplement: s1 [file s1]

**Supplementary Table S1.** Baseline characteristics in the SLE cohort

|                      | <b>SLE patients<br/>(n=101)</b> | <b>Controls<br/>(n=100)</b> | <b>P value <sup>1</sup></b> |
|----------------------|---------------------------------|-----------------------------|-----------------------------|
| Male sex, n (%)      | 8 (8)                           | 6 (6)                       | ns                          |
| Smoking, ever, n (%) | 56 (55)                         | 52 (52)                     | ns                          |
| Age, years (range)   | 44 (18-77)                      | 50 (20-82)                  | 0.0058                      |

<sup>1</sup> P-values show differences between SLE patients and controls. N = number; ns = not significant. Smoking, ever includes current and former smokers.
